# Supplementary material for: Comprehensive analyses of ZFP gene family and characterization of expression profiles during plant hormone response in cotton
Source: PubMed Central journal article supplement (PMC6652020; doi:10.1186/s12870-019-1932-6), 2019-07-23

**Figure S1.** Phylogenetic analysis of the *ZFP* gene family in three *Gossypium* species and *A. thaliana* by Maximum Likelihood method.

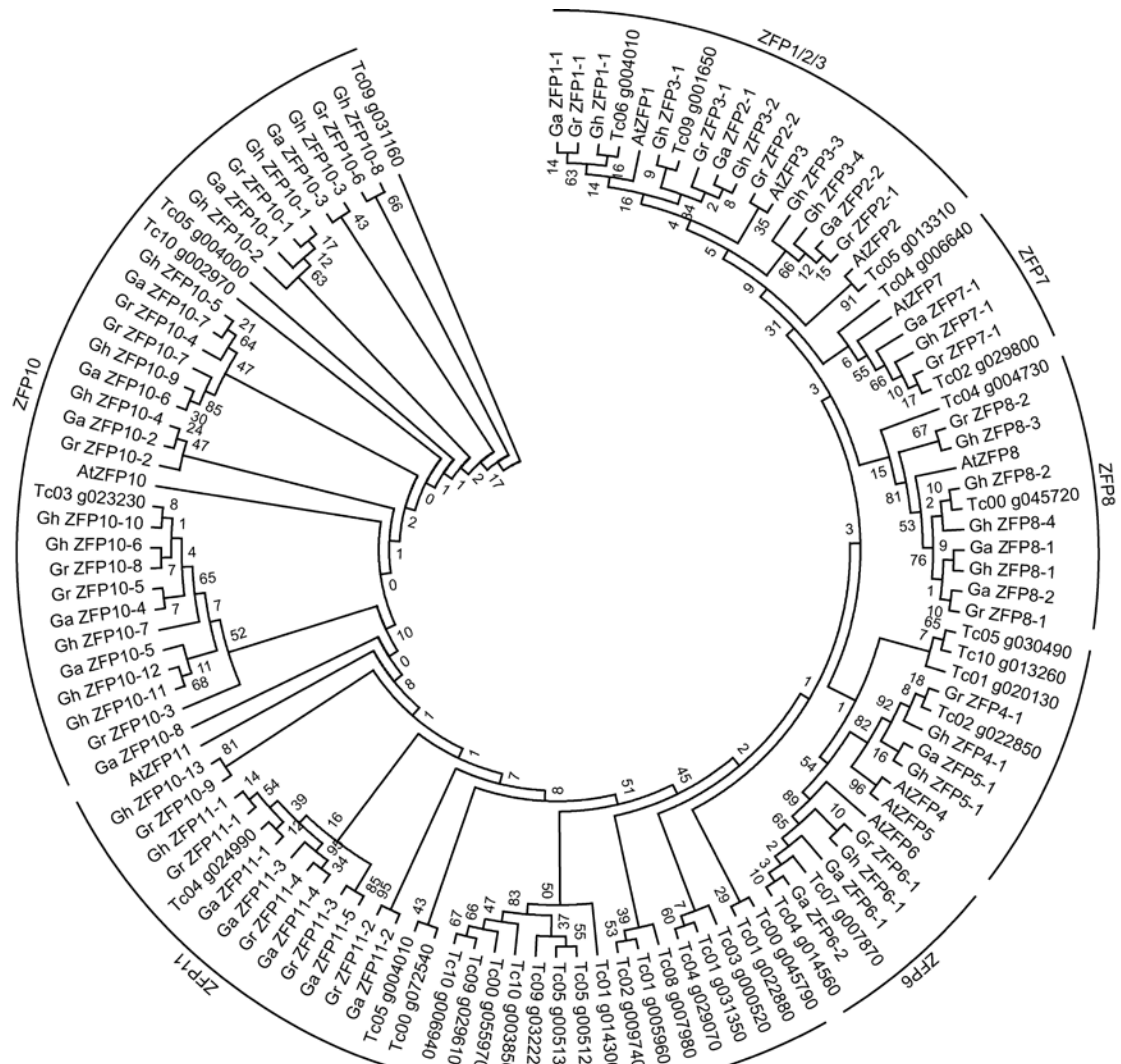

Supplement: 12870_2019_1932_MOESM2_ESM.pdf [file 12870_2019_1932_MOESM2_ESM.pdf]
