# Supplementary material for: Comprehensive analyses of ZFP gene family and characterization of expression profiles during plant hormone response in cotton
Source: PubMed Central journal article supplement (PMC6652020; doi:10.1186/s12870-019-1932-6), 2019-07-23

**Figure S2.** Phylogenetic analysis of the *ZFP* gene family. MEGA 6.0 software was used with the Neighbor-Joining method and bootstrapping with 1,000 iterations.

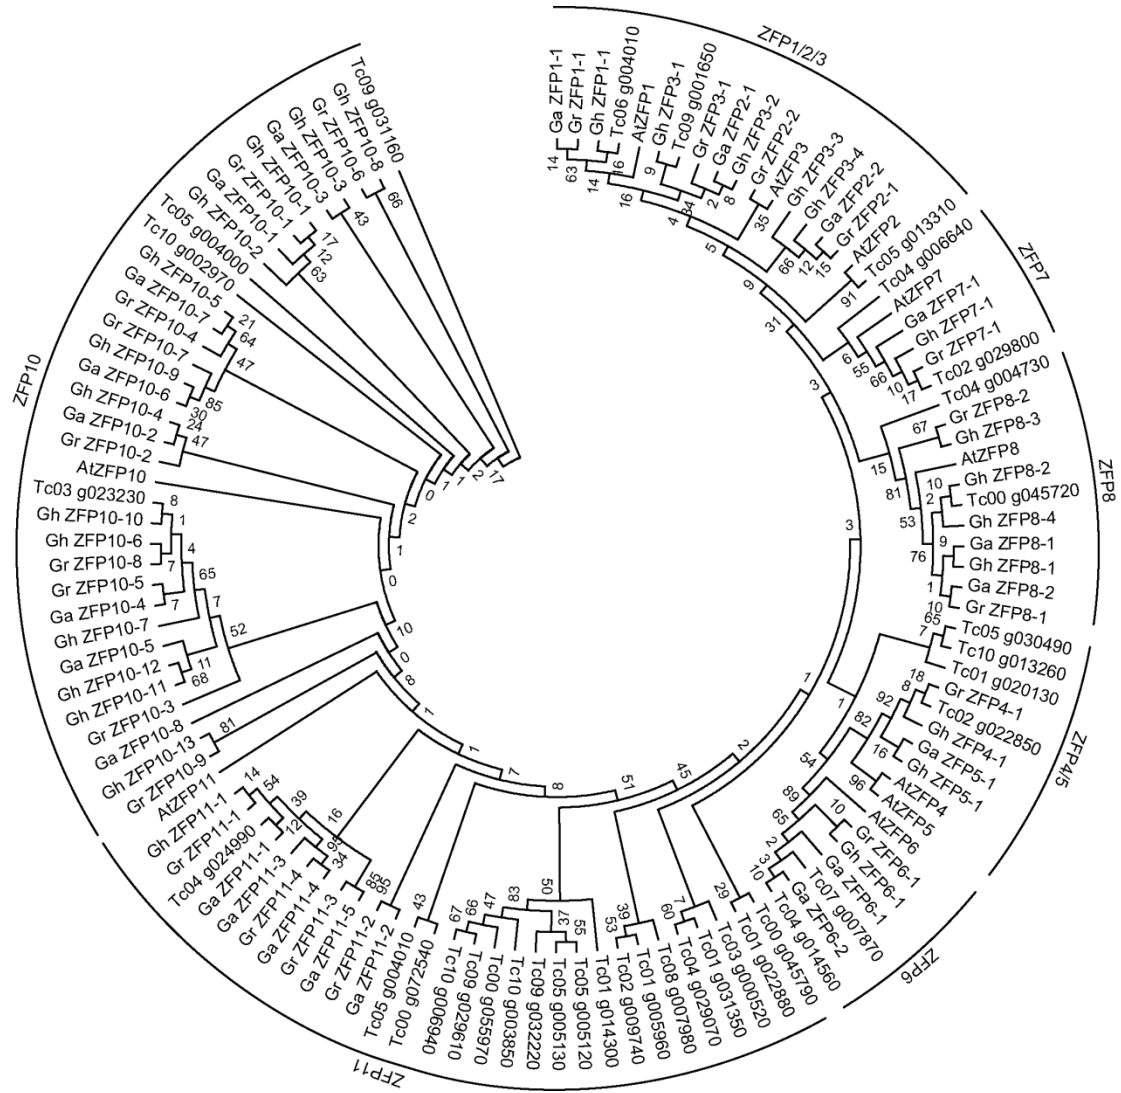

Supplement: 12870_2019_1932_MOESM3_ESM.pdf [file 12870_2019_1932_MOESM3_ESM.pdf]
