# Supplementary material for: Comprehensive analyses of ZFP gene family and characterization of expression profiles during plant hormone response in cotton
Source: PubMed Central journal article supplement (PMC6652020; doi:10.1186/s12870-019-1932-6), 2019-07-23

**Figure S4.** Chromosomal location of *GaZFP* (a) and *GrZFP* (b) genes on chromosomes. The chromosome number is shown on the top of each chromosome. The scale bar indicates the length in megabases (Mb).

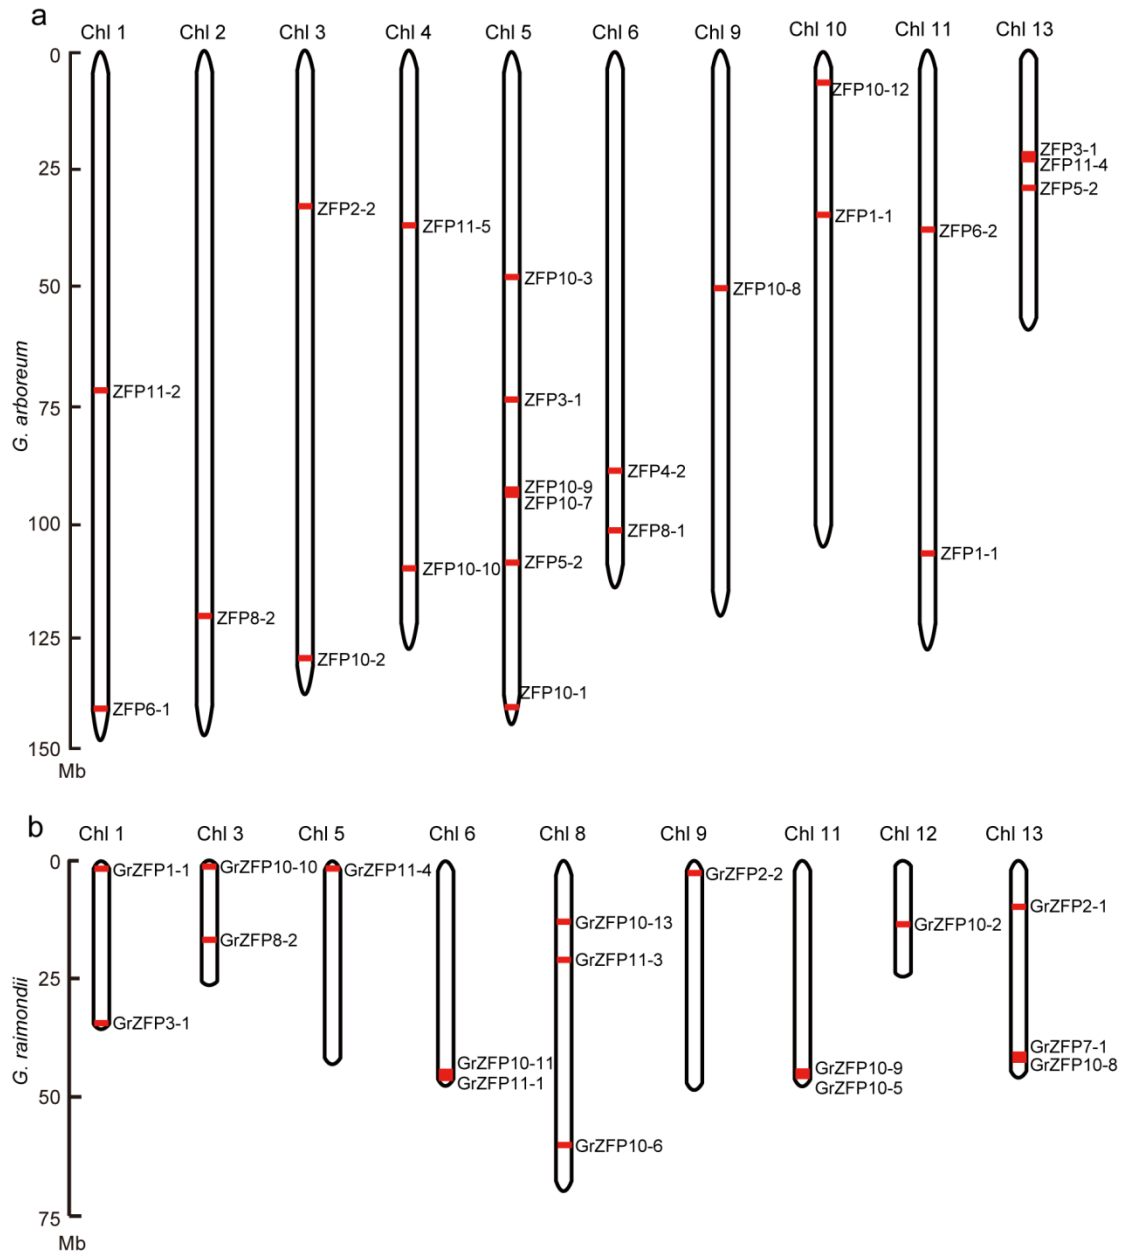

Supplement: 12870_2019_1932_MOESM5_ESM.pdf [file 12870_2019_1932_MOESM5_ESM.pdf]
