# Supplementary material for: Comprehensive analyses of ZFP gene family and characterization of expression profiles during plant hormone response in cotton
Source: PubMed Central journal article supplement (PMC6652020; doi:10.1186/s12870-019-1932-6), 2019-07-23

**Figure S5.** Analysis of 25 GhZFP with BES1 element present in their promoter regions. BES1 elements (red) were predicted using the online PLACE website.

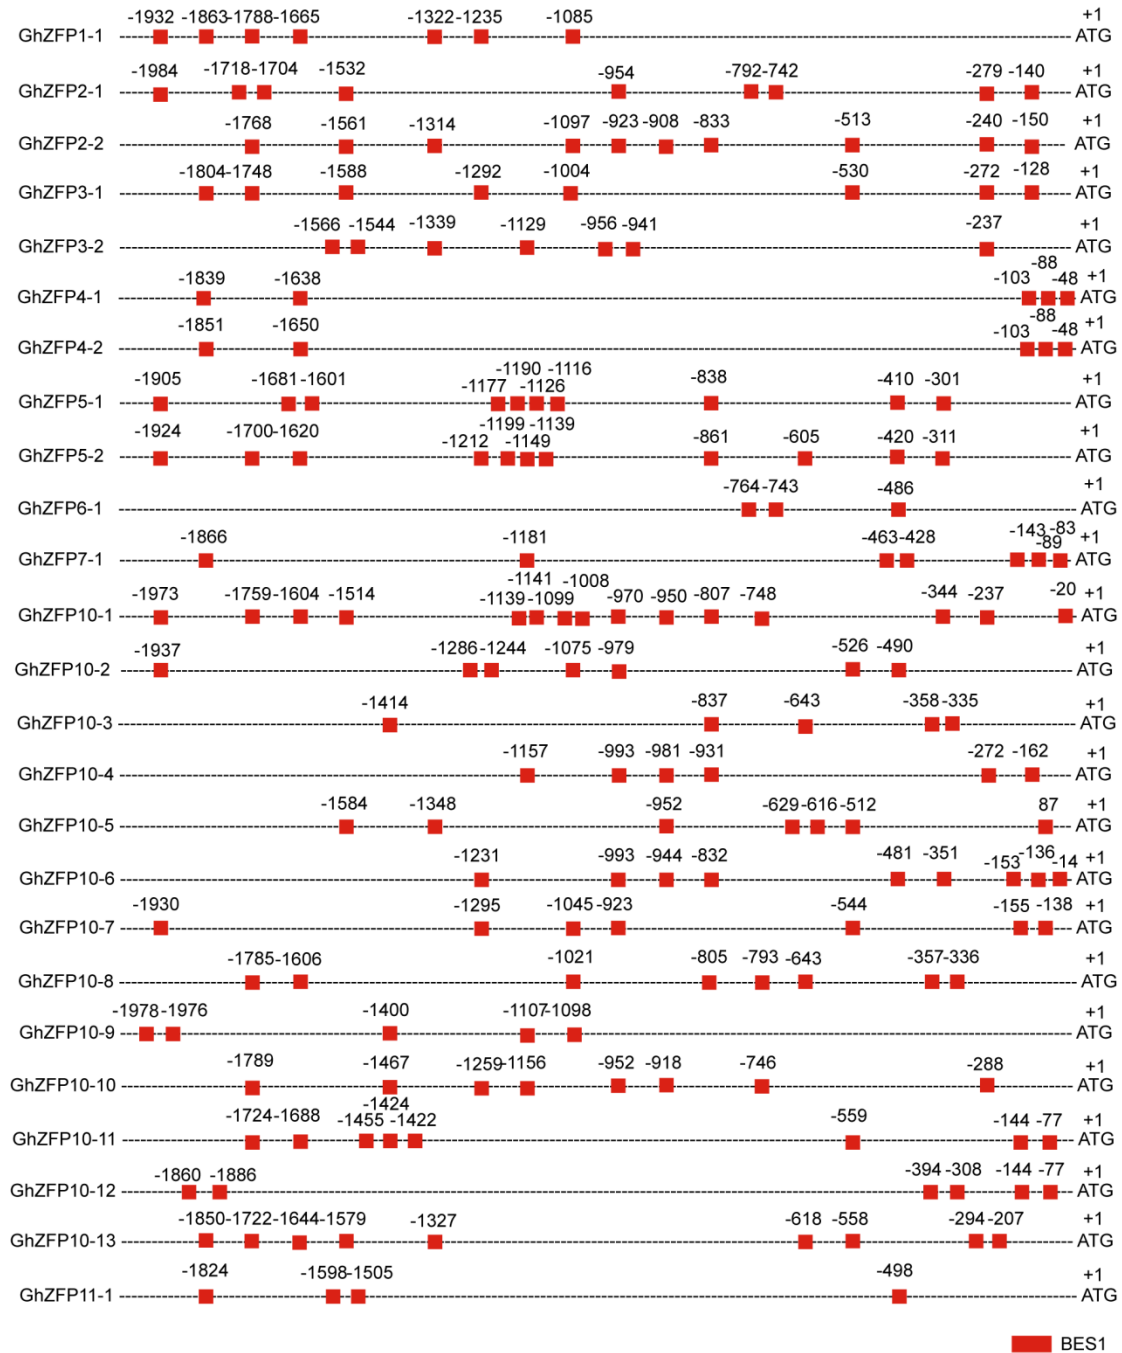

Supplement: 12870_2019_1932_MOESM6_ESM.pdf [file 12870_2019_1932_MOESM6_ESM.pdf]
